# Supplementary material for: Lactobacillus gasseri APC 678 Reduces Shedding of the Pathogen Clostridium difficile in a Murine Model
Source: PubMed Central journal article supplement (PMC6391587; doi:10.3389/fmicb.2019.00273), 2019-02-20
Supplement: Data_Sheet_1.pdf [file Data_Sheet_1.pdf]

*Supplementary Material*

***Lactobacillus gasseri* APC 678 Reduces Shedding of the Pathogen  
*Clostridium difficile* in a Murine Model**

**Lisa Quigley<sup>#</sup>, Mairéad Coakley<sup>#</sup>, Debebe Alemayehu, Mary C. Rea, Patrick G. Casey, Órla O'Sullivan, Eileen Murphy, Barry Kiely, Paul D. Cotter, Colin Hill and R. Paul Ross\***

**\*Correspondence:**

Prof. R. Paul Ross

[p.ross@ucc.ie](mailto:p.ross@ucc.ie)

<sup>#</sup> LQ and MC are joint first authors

## 1.1 Supplementary Figures

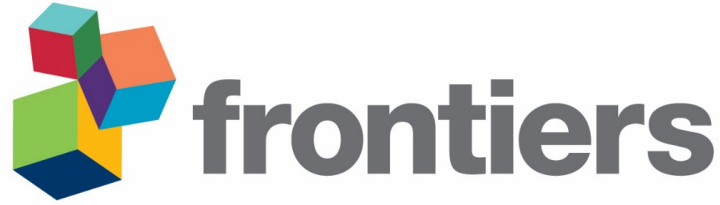

**Supplementary Figure 1:** Relative abundance (%) of bacterial phyla in the cecum at Day 7 of the control and test mice (*Lactobacillus gasseri* APC 678, *Lactobacillus rhamnosus* DPC 6111 and *Lactobacillus gasseri* ATCC 33323).

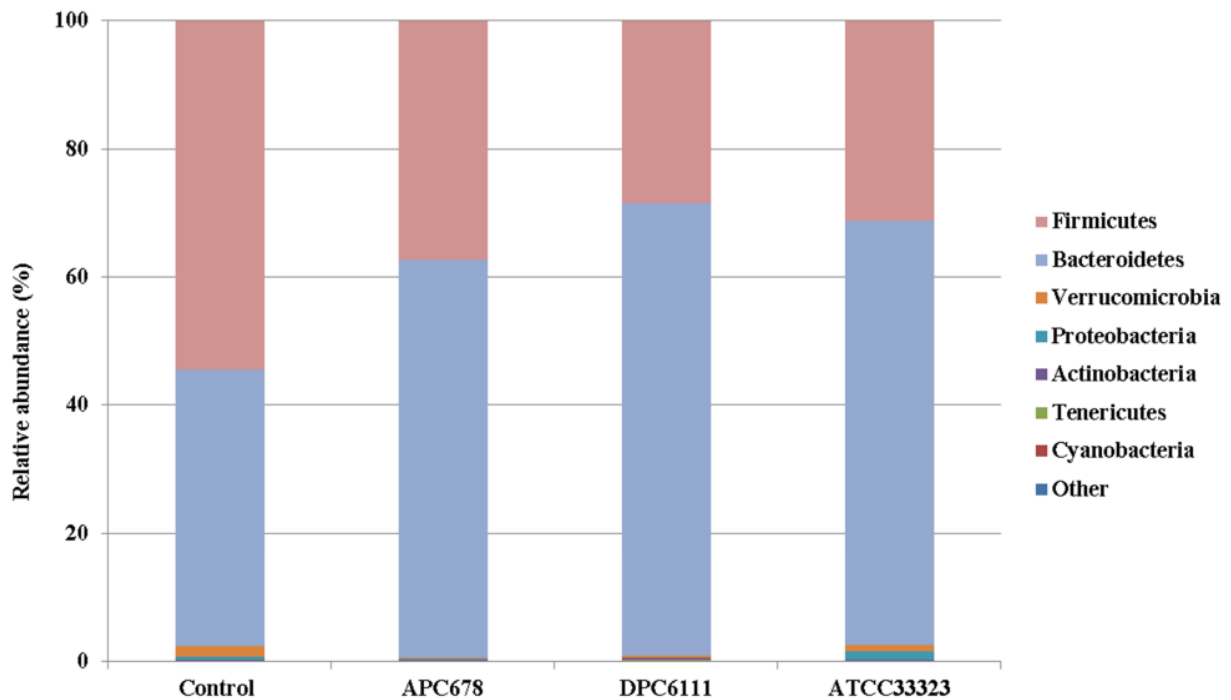

**Supplementary Figure 2:** Relative abundance (%) of bacterial families in the cecum at Day 7 of the control mice and test mice (*Lactobacillus gasseri* APC 678, *Lactobacillus rhamnosus* DPC 6111 and *Lactobacillus gasseri* ATCC 33323).

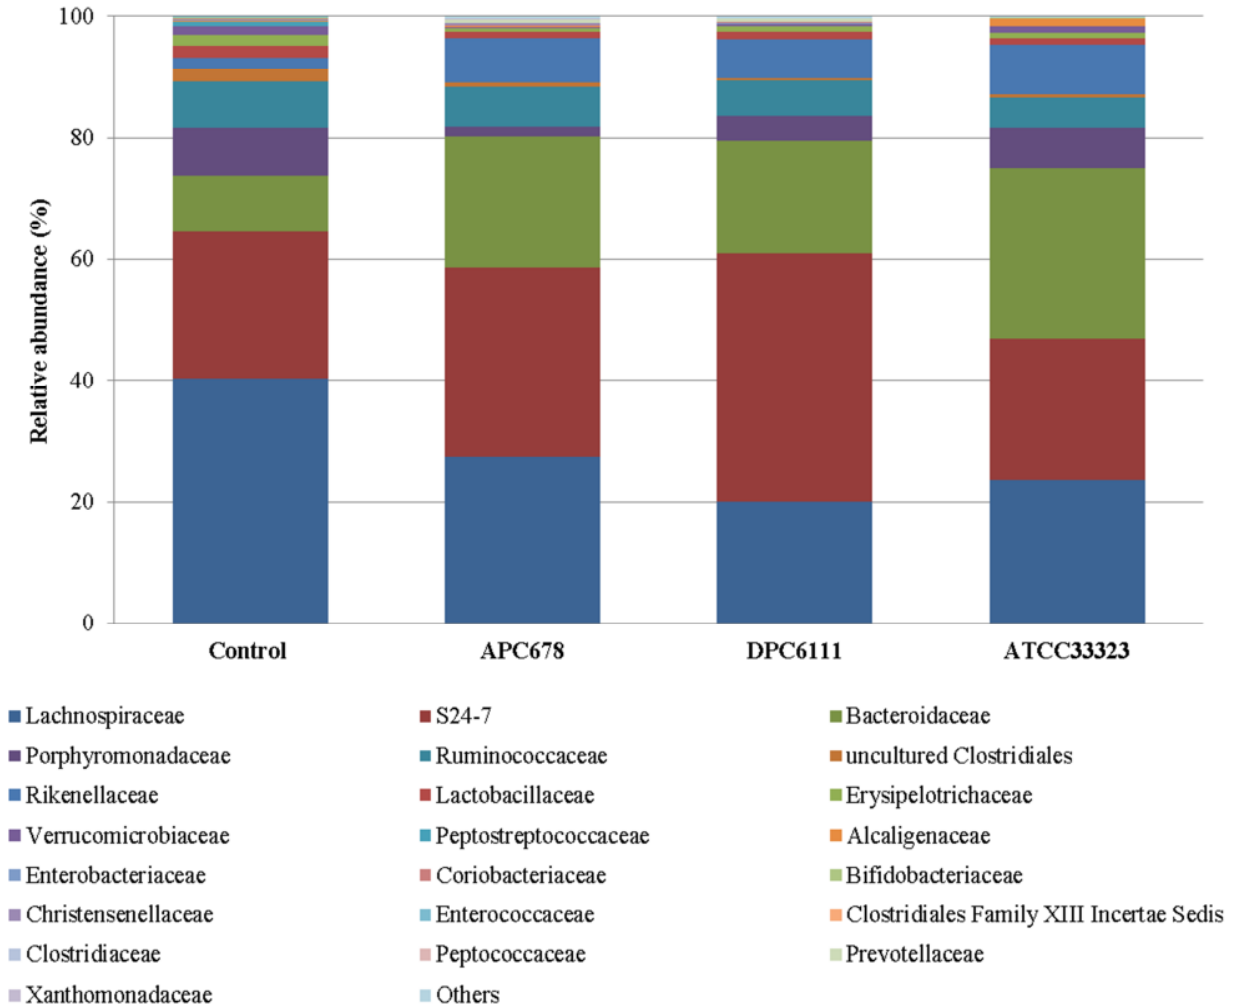

**Supplementary Figure 3:** Relative abundance (%) of bacterial genera in the cecum at Day 7 of the control mice and test mice (*Lactobacillus gasseri* APC 678, *Lactobacillus rhamnosus* DPC 6111 and *Lactobacillus gasseri* ATCC 33323).

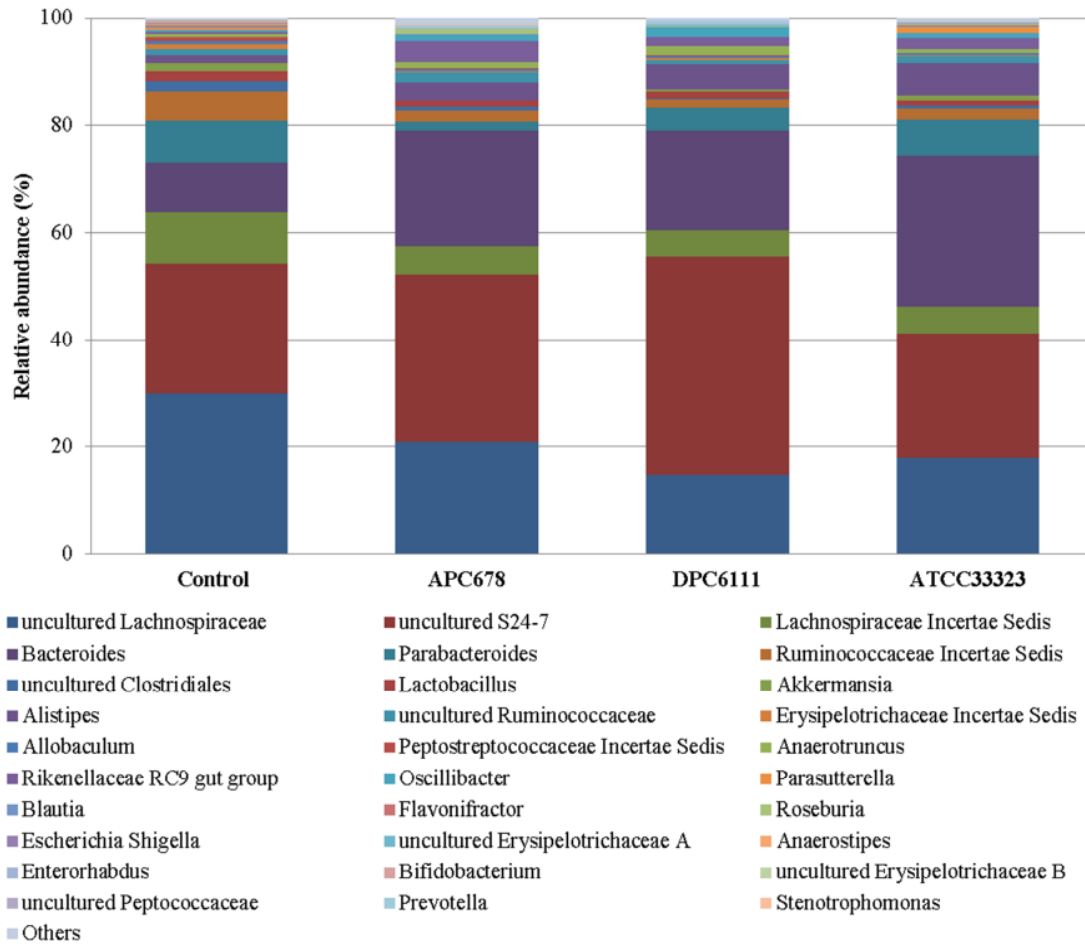

## 1.2 Supplementary Tables

**Supplementary Table 1:** Source and origin of bacterial strains used during this study.

| <b>Bacterial strain</b>                                  | <b>Source</b>                                 | <b>Origin</b>                |
|----------------------------------------------------------|-----------------------------------------------|------------------------------|
| <i>Clostridium difficile</i> EM304 (ribotype 027)        | ELDERMET Culture Collection <sup>1</sup>      | elderly adult feces          |
| <i>Clostridium difficile</i> VPI 10463 (ATCC® 43255-FZ™) | American Type Culture Collection <sup>2</sup> | human abdominal wound        |
| <i>L. gasseri</i> APC 678                                | APC Culture Collection <sup>1</sup>           | human feces                  |
| <i>L. paracasei</i> APC 1483                             | APC Culture Collection                        | human feces                  |
| <i>L. rhamnosus</i> DPC 6111                             | DPC Culture Collection <sup>1</sup>           | human feces                  |
| <i>L. gasseri</i> DPC 6112                               | DPC Culture Collection                        | human feces                  |
| <i>L. gasseri</i> ATCC 33323                             | American Type Culture Collection              | human gastrointestinal tract |

<sup>1</sup>housed at Teagasc, Moorepark, Fermoy, Co. Cork, Ireland; <sup>2</sup>Manassas, VA 20110, USA.

**Supplementary Table 2:** Target strains, growth medium and incubation conditions for well diffusion assays to detect bacteriocin production by *L. gasseri* APC 678 *in vitro*.

| <b>Target strain</b>                                      | <b>Culture Collection code</b> | <b>Incubation conditions</b> | <b>Growth medium</b> |
|-----------------------------------------------------------|--------------------------------|------------------------------|----------------------|
| <i>Enterococcus faecium</i>                               | LMG <sup>1</sup> 11423         | 37°C, anaerobic              | MRS                  |
| <i>Enterococcus mundtii</i>                               | LMG 10758                      | 37°C, anaerobic              | MRS                  |
| <i>Enterococcus saccharolyticus</i>                       | LMG 11427                      | 37°C, anaerobic              | MRS                  |
| <i>Lactobacillus acidophilus</i>                          | LMG 9433                       | 37°C, anaerobic              | MRS                  |
| <i>Lactobacillus agilis</i>                               | LMG 9186                       | 37°C, anaerobic              | MRS                  |
| <i>Lactobacillus amylovorus</i>                           | LMG 9496                       | 37°C, anaerobic              | MRS                  |
| <i>Lactobacillus casei</i>                                | LMG 6904                       | 37°C, anaerobic              | MRS                  |
| <i>Lactobacillus crispatus</i>                            | LMG 9479                       | 37°C, anaerobic              | MRS                  |
| <i>Lactobacillus delbrueckii</i> subsp. <i>bulgaricus</i> | LMG 6901                       | 37°C, anaerobic              | MRS                  |
| <i>Lactobacillus delbrueckii</i> subsp. <i>lactis</i>     | LMG 7942                       | 37°C, anaerobic              | MRS                  |
| <i>Lactobacillus fermentum</i>                            | LMG 6902                       | 37°C, anaerobic              | MRS                  |
| <i>Lactobacillus plantarum</i>                            | LMG 6907                       | 37°C, anaerobic              | MRS                  |
| <i>Lactobacillus rhamnosus</i>                            | ATCC <sup>2</sup> 53103        | 37°C, anaerobic              | MRS                  |
| <i>Listeria innocua</i>                                   | DPC <sup>3</sup> 3572          | 37°C, aerobic                | BHI*                 |
| <i>Micrococcus luteus</i>                                 | DPC 6275                       | 30°C, aerobic                | BHI                  |
| <i>Salmonella typhimurium</i>                             | DPC 6048                       | 37°C, aerobic                | BHI                  |
| <i>Staphylococcus aureus</i>                              | DPC 5246                       | 37°C, aerobic                | BHI                  |

<sup>1</sup>LMG Culture Collection, B-9000 Gent, Belgium; <sup>2</sup>American Type Culture Collection, Manassas, VA 20110, USA and <sup>3</sup>DPC Culture Collection, Teagasc, Moorepark, Fermoy, Co. Cork, Ireland. \*BHI: Brain heart infusion medium, Merck, Darmstadt, Germany.

**Supplementary Table 3:** Relative abundance (%) of bacterial phyla in the cecum at Day 7 of the control and test mice (*Lactobacillus gasseri* APC 678, *Lactobacillus rhamnosus* DPC 6111 and *Lactobacillus gasseri* ATCC 33323). Average and standard error of the mean (SEM) of results for 10 mice per treatment are represented.

| <b>Group</b>                  | <b>Control</b> | <b>APC 678</b> | <b>DPC 6111</b> | <b>ATCC 33323</b> |
|-------------------------------|----------------|----------------|-----------------|-------------------|
| <b>relative abundance (%)</b> |                |                |                 |                   |
| <b>Firmicutes</b>             | 54.51±7.32     | 37.22±4.18     | 28.44±2.32*     | 31.29±3.63*       |
| <b>Bacteroidetes</b>          | 43.17±7.19     | 62.24±4.19     | 70.62±2.31*     | 66.25±3.88*       |
| <b>Verrucomicrobia</b>        | 1.53±1.42      | 0.08±0.03      | 0.35±0.12       | 0.93±0.76         |
| <b>Proteobacteria</b>         | 0.47±0.08      | 0.19±0.06*     | 0.09±0.03*      | 1.29±0.44         |
| <b>Actinobacteria</b>         | 0.26±0.05      | 0.18±0.03      | 0.19±0.04       | 0.13±0.03*        |
| <b>Tenericutes</b>            | 0.01±0.01      | 0.03±0.02      | 0.26±0.14       | 0.10±0.07         |
| <b>Cyanobacteria</b>          | 0.00±0.00      | 0.00±0.00      | 0.00±0.00       | 0.00±0.00         |
| <b>Other</b>                  | 0.04±0.01      | 0.05±0.01      | 0.05±0.01       | 0.02±0.01         |

\*significantly different compared to the control; significance was determined by  $p < 0.05$ .

**Supplementary Table 4:** Relative abundance (%) of bacterial families in the cecum at Day 7 of the control and test mice (*Lactobacillus gasseri* APC 678, *Lactobacillus rhamnosus* DPC 6111 and *Lactobacillus gasseri* ATCC 33323). Average and standard error of the mean (SEM) of results for 10 mice per treatment are represented.

| Group                                           | Control                | APC 678      | DPC 6111      | ATCC 33323    |
|-------------------------------------------------|------------------------|--------------|---------------|---------------|
|                                                 | relative abundance (%) |              |               |               |
| <i>Lachnospiraceae</i>                          | 40.346±5.285           | 27.461±3.459 | 20.141±2.049* | 23.600±3.273* |
| <b>S24-7</b>                                    | 24.104±5.359           | 31.182±2.779 | 40.720±3.787* | 23.214±4.942  |
| <i>Bacteroidaceae</i>                           | 9.289±3.278            | 21.603±4.812 | 18.614±3.699  | 28.214±5.646* |
| <i>Porphyromonadaceae</i>                       | 7.918±2.407            | 1.611±0.396  | 4.213±1.364   | 6.710±1.656   |
| <i>Ruminococcaceae</i>                          | 7.743±1.458            | 6.576±1.054  | 5.874±0.974   | 4.957±0.678   |
| <b>uncultured Clostridiales</b>                 | 2.008±0.655            | 0.639±0.130  | 0.213±0.082*  | 0.582±0.284*  |
| <i>Rikenellaceae</i>                            | 1.859±0.696            | 7.314±0.900* | 6.515±0.753*  | 8.112±1.439*  |
| <i>Lactobacillaceae</i>                         | 1.835±0.515            | 1.078±0.480  | 1.259±0.361   | 1.036±0.229   |
| <i>Erysipelotrichaceae</i>                      | 1.804±0.370            | 0.616±0.110* | 0.829±0.188*  | 0.948±0.341*  |
| <i>Verrucomicrobiaceae</i>                      | 1.531±1.419            | 0.084±0.029  | 0.354±0.121   | 0.928±0.755   |
| <i>Peptostreptococcaceae</i>                    | 0.603±0.245            | 0.078±0.054* | 0.019±0.013*  | 0.050±0.031*  |
| <i>Alcaligenaceae</i>                           | 0.286±0.060            | 0.085±0.043* | 0.069±0.032*  | 1.235±0.429   |
| <i>Enterobacteriaceae</i>                       | 0.177±0.072            | 0.010±0.004* | 0.017±0.009*  | 0.055±0.026   |
| <i>Coriobacteriaceae</i>                        | 0.130±0.040            | 0.140±0.025  | 0.167±0.036   | 0.063±0.018   |
| <i>Bifidobacteriaceae</i>                       | 0.126±0.031            | 0.039±0.016* | 0.024±0.011*  | 0.065±0.041*  |
| <i>Christensenellaceae</i>                      | 0.103±0.046            | 0.375±0.178  | 0.000±0.000   | 0.012±0.006   |
| <i>Enterococcaceae</i>                          | 0.030±0.008            | 0.023±0.009  | 0.007±0.003*  | 0.013±0.007   |
| <b>Clostridiales Family XIII Incertae Sedis</b> | 0.019±0.006            | 0.028±0.005  | 0.029±0.010   | 0.019±0.005   |
| <i>Clostridiaceae</i>                           | 0.016±0.010            | 0.000±0.000  | 0.002±0.002   | 0.001±0.001   |
| <i>Anaeroplasmataceae</i>                       | 0.013±0.011            | 0.033±0.023  | 0.258±0.140   | 0.097±0.075   |
| <i>Oxalobacteraceae</i>                         | 0.005±0.002            | 0.000±0.000  | 0.000±0.000   | 0.000±0.000   |
| <i>Peptococcaceae</i>                           | 0.004±0.002            | 0.041±0.009* | 0.020±0.007   | 0.066±0.049   |
| <i>Rhodospirillaceae</i>                        | 0.002±0.001            | 0.008±0.004  | 0.000±0.000   | 0.000±0.000   |
| <i>Staphylococcaceae</i>                        | 0.002±0.001            | 0.288±0.149  | 0.045±0.035   | 0.000±0.000   |
| <i>Streptococcaceae</i>                         | 0.001±0.001            | 0.001±0.000  | 0.000±0.000   | 0.000±0.000   |
| <b>Rickettsiales mitochondria</b>               | 0.001±0.001            | 0.000±0.000  | 0.000±0.000   | 0.000±0.000   |
| <b>Cyanobacteria 4C0d-2 uncultured</b>          | 0.001±0.001            | 0.000±0.000  | 0.000±0.000   | 0.000±0.000   |
| <i>Moraxellaceae</i>                            | 0.001±0.001            | 0.005±0.002  | 0.000±0.000   | 0.000±0.000   |
| <i>Planococcaceae</i>                           | 0.000±0.000            | 0.012±0.005  | 0.000±0.000   | 0.000±0.000   |
| <i>Prevotellaceae</i>                           | 0.000±0.000            | 0.533±0.198  | 0.561±0.201*  | 0.001±0.001   |
| <b>Bacteroidales ratAN060301C</b>               | 0.000±0.000            | 0.000±0.000  | 0.000±0.000   | 0.000±0.000   |
| <i>Bacillaceae</i>                              | 0.000±0.000            | 0.001±0.001  | 0.000±0.000   | 0.000±0.000   |
| <i>Methylobacteriaceae</i>                      | 0.000±0.000            | 0.000±0.000  | 0.000±0.000   | 0.001±0.001   |
| <i>Comamonadaceae</i>                           | 0.000±0.000            | 0.002±0.001  | 0.000±0.000   | 0.000±0.000   |
| <i>Desulfovibrionaceae</i>                      | 0.000±0.000            | 0.024±0.024  | 0.000±0.000   | 0.000±0.000   |
| <i>Xanthomonadaceae</i>                         | 0.000±0.000            | 0.057±0.048* | 0.001±0.001   | 0.000±0.000   |
| <b>Others</b>                                   | 0.045±0.014            | 0.051±0.005  | 0.047±0.010   | 0.018±0.010   |

\*significantly different compared to the control; significance was determined by  $p < 0.05$ .



**Supplementary Table 5:** Relative abundance (%) of bacterial genera in the cecum at Day 7 of the control and test mice (*Lactobacillus gasseri* APC 678, *Lactobacillus rhamnosus* DPC 6111 and *Lactobacillus gasseri* ATCC 33323). Average and standard error of the mean (SEM) of results for 10 mice per treatment are represented.

| Genus                                           | Control                | APC 678      | DPC 6111      | ATCC 33323    |
|-------------------------------------------------|------------------------|--------------|---------------|---------------|
|                                                 | relative abundance (%) |              |               |               |
| <b>uncultured Lachnospiraceae A</b>             | 29.985±3.699           | 20.933±3.149 | 14.777±2.014* | 18.000±3.312* |
| <b>uncultured S24-7</b>                         | 24.104±5.359           | 31.182±2.779 | 40.720±3.787* | 23.214±4.942  |
| <i>Lachnospiraceae Incertae Sedis</i>           | 9.665±2.069            | 5.321±0.918  | 4.994±1.722   | 4.906±0.772   |
| <i>Bacteroides</i>                              | 9.289±3.278            | 21.603±4.812 | 18.614±3.699  | 28.214±5.646* |
| <i>Parabacteroides</i>                          | 7.917±2.407            | 1.611±0.396  | 4.213±1.364   | 6.710±1.656   |
| <i>Ruminococcaceae Incertae Sedis</i>           | 5.364±1.393            | 2.185±0.485* | 1.441±0.300*  | 2.014±0.454*  |
| <b>uncultured Clostridiales</b>                 | 2.008±0.655            | 0.639±0.130  | 0.213±0.082*  | 0.582±0.284*  |
| <i>Lactobacillus</i>                            | 1.835±0.515            | 1.078±0.480  | 1.259±0.361   | 1.036±0.229   |
| <i>Akkermansia</i>                              | 1.531±1.419            | 0.084±0.029  | 0.354±0.121   | 0.928±0.755   |
| <i>Alistipes</i>                                | 1.406±0.507            | 3.395±0.343* | 4.949±0.585*  | 6.034±0.907*  |
| <b>uncultured Ruminococcaceae</b>               | 1.081±0.189            | 2.031±0.339* | 0.771±0.286   | 1.308±0.441   |
| <i>Erysipelotrichaceae Incertae Sedis</i>       | 0.953±0.392            | 0.171±0.062  | 0.290±0.060   | 0.268±0.087   |
| <i>Allobaculum</i>                              | 0.691±0.346            | 0.401±0.133  | 0.449±0.150   | 0.294±0.139   |
| <i>Peptostreptococcaceae Incertae Sedis</i>     | 0.603±0.245            | 0.078±0.054* | 0.019±0.013*  | 0.050±0.031*  |
| <i>Anaerotruncus</i>                            | 0.601±0.155            | 1.090±0.252  | 1.846±0.399*  | 0.755±0.154   |
| <i>Rikenellaceae RC9 gut group</i>              | 0.453±0.319            | 3.895±0.815* | 1.566±0.590*  | 2.078±0.956   |
| <i>Oscillibacter</i>                            | 0.363±0.199            | 1.151±0.258* | 1.805±0.421*  | 0.787±0.291   |
| <i>Parasutterella</i>                           | 0.286±0.060            | 0.085±0.043* | 0.069±0.032*  | 1.235±0.429   |
| <i>Blautia</i>                                  | 0.267±0.105            | 0.076±0.072  | 0.030±0.017   | 0.132±0.103   |
| <i>Flavonifractor</i>                           | 0.251±0.176            | 0.012±0.010* | 0.007±0.005*  | 0.087±0.058   |
| <i>Roseburia</i>                                | 0.207±0.083            | 0.903±0.291* | 0.212±0.104   | 0.288±0.228   |
| <i>Escherichia/Shigella</i>                     | 0.177±0.072            | 0.010±0.004* | 0.017±0.009*  | 0.055±0.026   |
| <b>uncultured Erysipelotrichaceae A</b>         | 0.138±0.030            | 0.036±0.008* | 0.054±0.018*  | 0.039±0.009*  |
| <i>Anaerostipes</i>                             | 0.129±0.040            | 0.064±0.049  | 0.064±0.023   | 0.065±0.040   |
| <i>Enterorhabdus</i>                            | 0.128±0.040            | 0.135±0.023  | 0.159±0.034   | 0.059±0.017   |
| <i>Bifidobacterium</i>                          | 0.126±0.031            | 0.039±0.016* | 0.024±0.011*  | 0.065±0.041*  |
| <b>uncultured Christensenellaceae</b>           | 0.102±0.046            | 0.375±0.178  | 0.000±0.000   | 0.008±0.005   |
| <i>Ruminococcus</i>                             | 0.082±0.045            | 0.102±0.072  | 0.001±0.001   | 0.005±0.004   |
| <i>Coprococcus</i>                              | 0.053±0.030            | 0.063±0.015  | 0.017±0.014   | 0.020±0.009   |
| <i>Marvinbryantia</i>                           | 0.038±0.007            | 0.099±0.042  | 0.047±0.031   | 0.188±0.079   |
| <i>Enterococcus</i>                             | 0.030±0.008            | 0.023±0.009  | 0.007±0.003*  | 0.013±0.007   |
| <i>Clostridiales Family XIII Incertae Sedis</i> | 0.019±0.006            | 0.025±0.004  | 0.029±0.010   | 0.012±0.004   |
| <b>uncultured Erysipelotrichaceae B</b>         | 0.017±0.007            | 0.009±0.004  | 0.026±0.012   | 0.011±0.008   |
| <i>Clostridium</i>                              | 0.016±0.010            | 0.000±0.000  | 0.002±0.002   | 0.001±0.001   |
| <i>Anaeroplasma</i>                             | 0.013±0.011            | 0.033±0.023  | 0.258±0.140   | 0.097±0.075   |
| <i>Oxalobacter</i>                              | 0.005±0.002            | 0.000±0.000  | 0.000±0.000   | 0.000±0.000   |
| <i>Coprobacillus</i>                            | 0.004±0.004            | 0.000±0.000  | 0.010±0.010   | 0.337±0.275   |
| <b>uncultured Peptococcaceae</b>                | 0.004±0.002            | 0.025±0.005* | 0.006±0.002   | 0.066±0.049   |

## Supplementary Material

|                                                            |             |              |              |             |
|------------------------------------------------------------|-------------|--------------|--------------|-------------|
| <i>Acetitomaculum</i>                                      | 0.002±0.001 | 0.000±0.000  | 0.000±0.000  | 0.000±0.000 |
| <i>Thalassospira</i>                                       | 0.002±0.001 | 0.008±0.004  | 0.000±0.000  | 0.000±0.000 |
| <i>Staphylococcus</i>                                      | 0.002±0.001 | 0.287±0.149  | 0.045±0.035  | 0.000±0.000 |
| <i>Streptococcus</i>                                       | 0.001±0.001 | 0.001±0.000  | 0.000±0.000  | 0.000±0.000 |
| <i>Christensenella</i>                                     | 0.001±0.001 | 0.000±0.000  | 0.000±0.000  | 0.004±0.002 |
| <b>uncultured Coriobacteriaceae</b>                        | 0.001±0.001 | 0.005±0.002  | 0.007±0.005  | 0.004±0.003 |
| <i>Idiospermum</i>                                         | 0.001±0.001 | 0.000±0.000  | 0.000±0.000  | 0.000±0.000 |
| <b>uncultured Cyanobacteria 4C0d-2</b>                     | 0.001±0.001 | 0.000±0.000  | 0.000±0.000  | 0.000±0.000 |
| <i>Acinetobacter</i>                                       | 0.001±0.001 | 0.005±0.002  | 0.000±0.000  | 0.000±0.000 |
| <i>Sporosarcina</i>                                        | 0.000±0.000 | 0.012±0.005  | 0.000±0.000  | 0.000±0.000 |
| <i>Barnesiella</i>                                         | 0.000±0.000 | 0.000±0.000  | 0.000±0.000  | 0.000±0.000 |
| <i>Prevotella</i>                                          | 0.000±0.000 | 0.533±0.198  | 0.561±0.201* | 0.000±0.000 |
| <b>uncultured Prevotellaceae</b>                           | 0.000±0.000 | 0.000±0.000  | 0.000±0.000  | 0.001±0.001 |
| <i>Rikenella</i>                                           | 0.000±0.000 | 0.025±0.021  | 0.000±0.000  | 0.000±0.000 |
| <b>uncultured Bacteroidales ratAN060301C</b>               | 0.000±0.000 | 0.000±0.000  | 0.000±0.000  | 0.000±0.000 |
| <i>Bacillus</i>                                            | 0.000±0.000 | 0.001±0.001  | 0.000±0.000  | 0.000±0.000 |
| <i>Salinicoccus</i>                                        | 0.000±0.000 | 0.001±0.001  | 0.000±0.000  | 0.000±0.000 |
| <i>Anaerovorax</i>                                         | 0.000±0.000 | 0.000±0.000  | 0.000±0.000  | 0.001±0.001 |
| <b>uncultured Clostridiales Family XIII Incertae Sedis</b> | 0.000±0.000 | 0.003±0.002  | 0.000±0.000  | 0.007±0.003 |
| <b>uncultured Lachnospiraceae B</b>                        | 0.000±0.000 | 0.002±0.002  | 0.000±0.000  | 0.000±0.000 |
| <i>Peptococcus</i>                                         | 0.000±0.000 | 0.016±0.009  | 0.015±0.006  | 0.000±0.000 |
| <i>Hydrogenoanaerobacterium</i>                            | 0.000±0.000 | 0.004±0.002* | 0.000±0.000  | 0.000±0.000 |
| <i>Subdoligranulum</i>                                     | 0.000±0.000 | 0.000±0.000  | 0.003±0.002  | 0.000±0.000 |
| <i>Methylobacterium</i>                                    | 0.000±0.000 | 0.000±0.000  | 0.000±0.000  | 0.001±0.001 |
| <i>Variovorax</i>                                          | 0.000±0.000 | 0.002±0.001  | 0.000±0.000  | 0.000±0.000 |
| <i>Bilophila</i>                                           | 0.000±0.000 | 0.024±0.024  | 0.000±0.000  | 0.000±0.000 |
| <i>Stenotrophomonas</i>                                    | 0.000±0.000 | 0.057±0.048* | 0.001±0.001  | 0.000±0.000 |
| <b>Other</b>                                               | 0.045±0.014 | 0.051±0.005  | 0.047±0.010  | 0.018±0.010 |

\*significantly different compared to the control; significance was determined by p<0.05.
